# Supplementary material for: Inhibition of Osteoclast Differentiation and Bone Resorption by Bisphosphonate-conjugated Gold Nanoparticles
Source: PubMed Central journal article supplement (PMC4890291; doi:10.1038/srep27336), 2016-06-02

# **Inhibition of Osteoclast Differentiation and Bone Resorption by Bisphosphonate-conjugated Gold Nanoparticles**

**Donghyun Lee<sup>1,+</sup>, Dong Nyoung Heo<sup>3,+</sup>, Han-Jun Kim<sup>4</sup>, Wan-Kyu Ko<sup>1</sup>, Sang Jin Lee<sup>1</sup>, Min Heo<sup>1</sup>, Jae Beum Bang<sup>5</sup>, Jung Bok Lee<sup>6</sup>, Deok-Sang Hwang<sup>7</sup>, Sun Hee Do<sup>4,\*</sup> and Il Keun Kwon<sup>2,\*</sup>**

<sup>1</sup>Kyung Hee University, Department of Dentistry, Graduate School, 26, Kyungheedaero, Dongdaemun-gu, Seoul 02477, Korea

<sup>2</sup>Kyung Hee University, Department of Dental Materials, School of Dentistry, 26, Kyungheedaero, Dongdaemun-gu, Seoul 02477, Korea

<sup>3</sup>The George Washington University, Department of Mechanical and Aerospace Engineering, Washington DC 20052, United states

<sup>4</sup>Konkuk University, Department of Clinical Pathology, College of Veterinary Medicine, Seoul 05029, Korea

<sup>5</sup>Kyung Hee University, Department of Dental Education, School of Dentistry, 26, Kyungheedaero, Dongdaemun-gu, Seoul 02477, Korea

<sup>6</sup>Vanderbilt University, Department of Biomedical Engineering, Nashville, TN 37235, United States

<sup>7</sup>Department of Korean Gynecology, Conmaul Hospital, Kyung Hee University, Seoul 02477, Korea

\*Correspondence and requests for materials should be addressed to S.H. (email: shdo@konkuk.ac.kr) and I. K. (email: kwoni@khu.ac.kr)

<sup>+</sup>These authors contributed equally to this work.

## Supplementary Figure captions

**Supplementary Figure S1.** Body weight changes in control mouse (Con), OVX mouse receiving no treatment (OVX), gold nanoparticles (GNPs), alendronate (ALD) and alendronate-conjugated gold nanoparticles (GNPs-ALD) for 12 weeks. Each point represents the mean  $\pm$  SD, error bars in the figure are presented as SD, n=8.

**Supplementary Figure S2.** Micro-computed tomography ( $\mu$ -CT) image of Con (A), OVX (B), GNPs (C), ALD (D) and GNPs-ALD (E).

**Supplementary Figure S3.** Evaluation of cytotoxicity of BMM cells on high concentrations of GNPs (A) and ALD (B). Results are mean  $\pm$ SD of triplicate experiments.

## Supplementary Figures

S1.

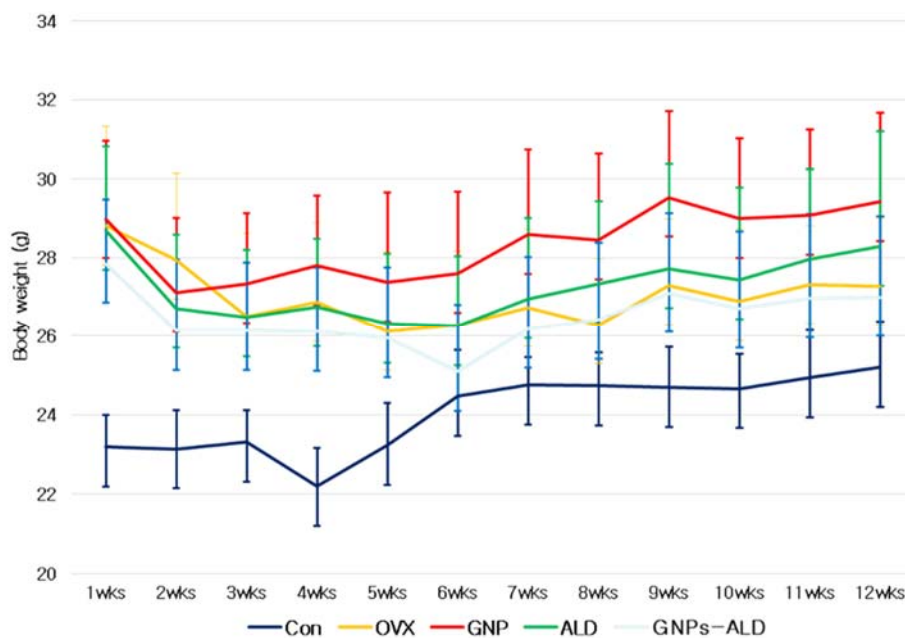

S2.

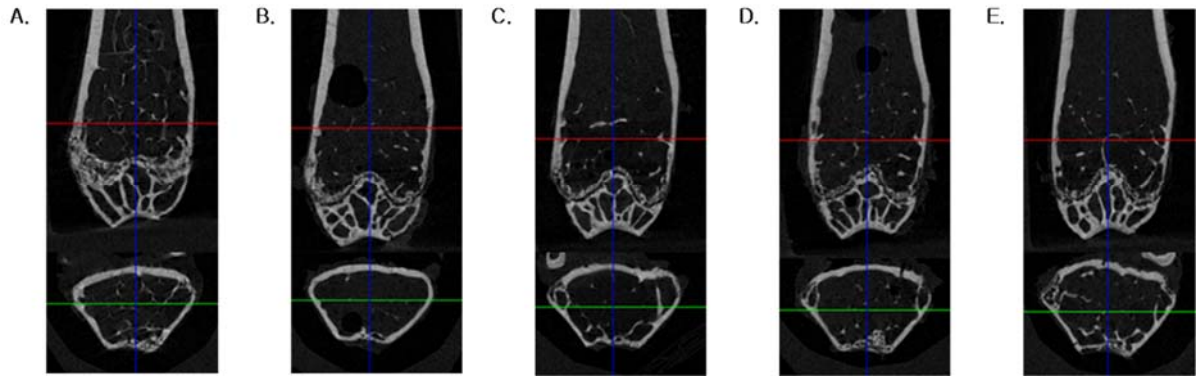

S3.

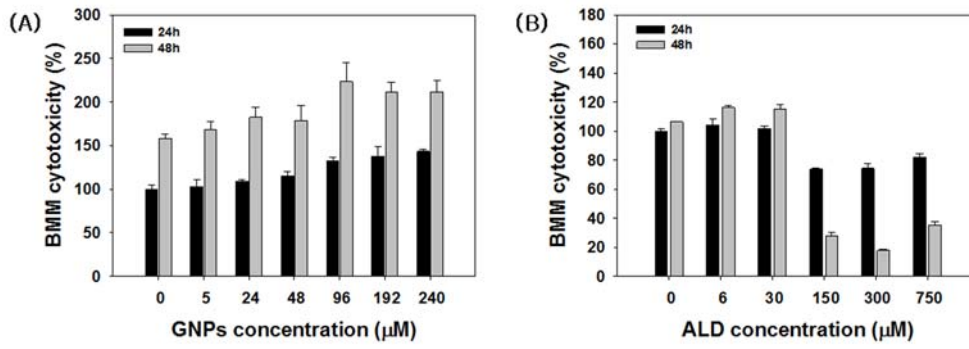

Supplement: srep27336-s1.pdf [file srep27336-s1.pdf]
